# Supplementary figures and images for: pH Responsive Tunable Plasmonic Resonators Based on Gold-Polysaccharide Nanocomposites
Source: MDPI journal article supplement (doi:10.3390/materproc2022009010), 2022-04-29

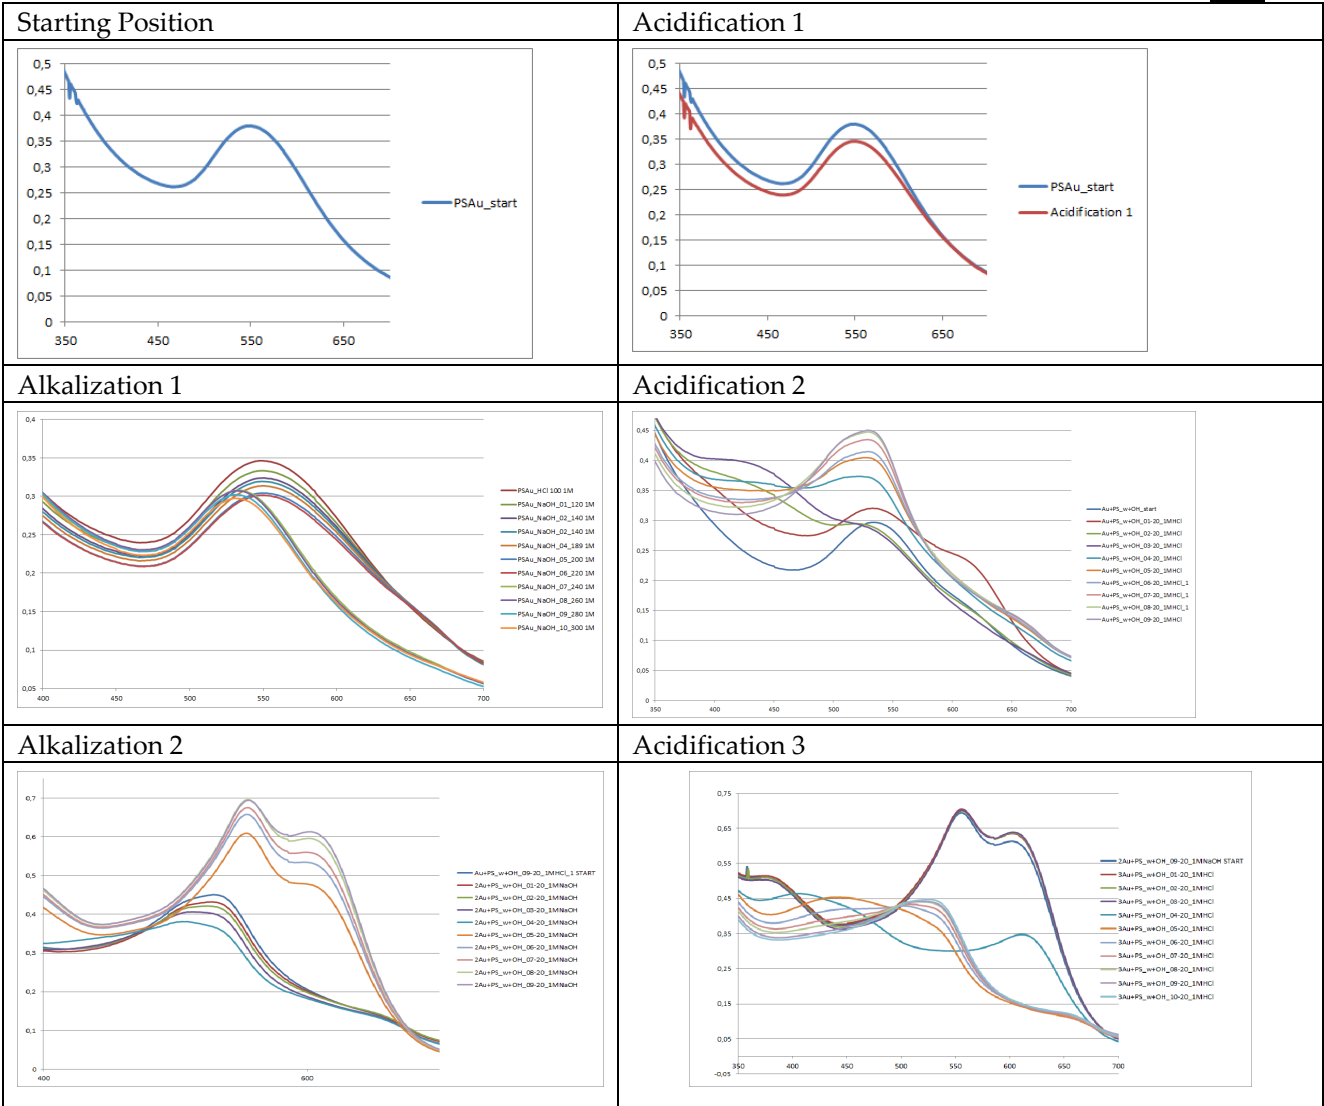

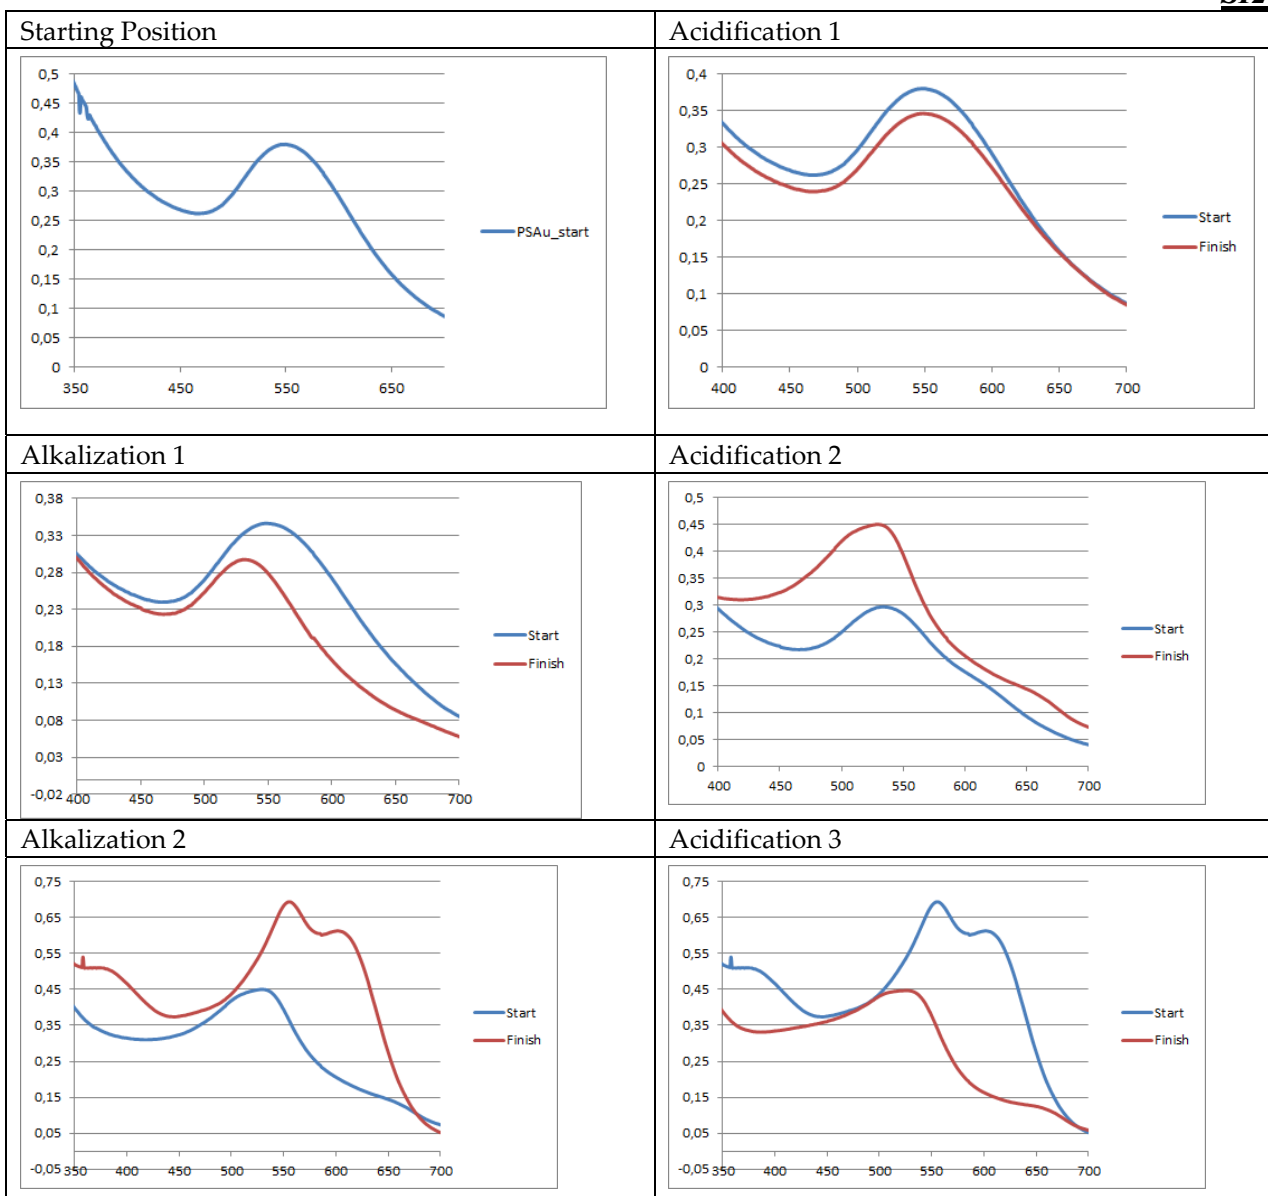

Acidification 1-3

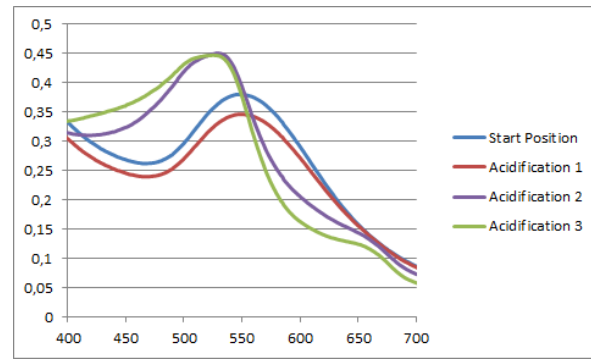

Alkalization 1-2

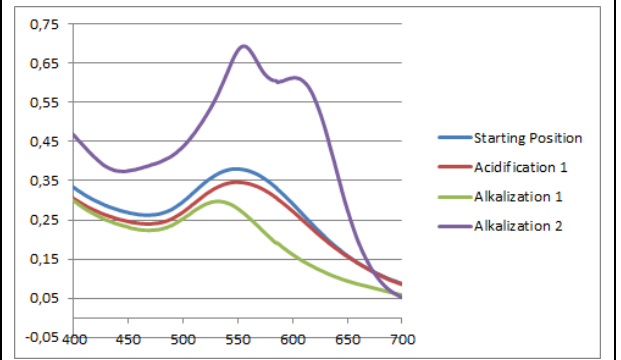

Supplement: s1 [file s1]
